# Supplementary material for: Continuous biomarker monitoring by particle mobility sensing with single molecule resolution
Source: PubMed Central journal article supplement (PMC6026194; doi:10.1038/s41467-018-04802-8), 2018-06-29
Supplement: 41467_2018_4802_MOESM3_ESM.pdf [file 41467_2018_4802_MOESM3_ESM.pdf]

## Description of Additional Supplementary Files

File Name: Supplementary Movie 1

Description: Animation of Biosensing by Particle Mobility. Sketched are: particles (orange), dsDNA tether (blue helix), capture molecules on the particle (blue), capture molecules on the substrate (purple), biomarker molecules in solution (green).
